# Supplementary material
Source: PubMed Central journal article supplement (PMC9669163)

**Supplemental Figure 1** Flow Diagram of Literature Search and Selection Process

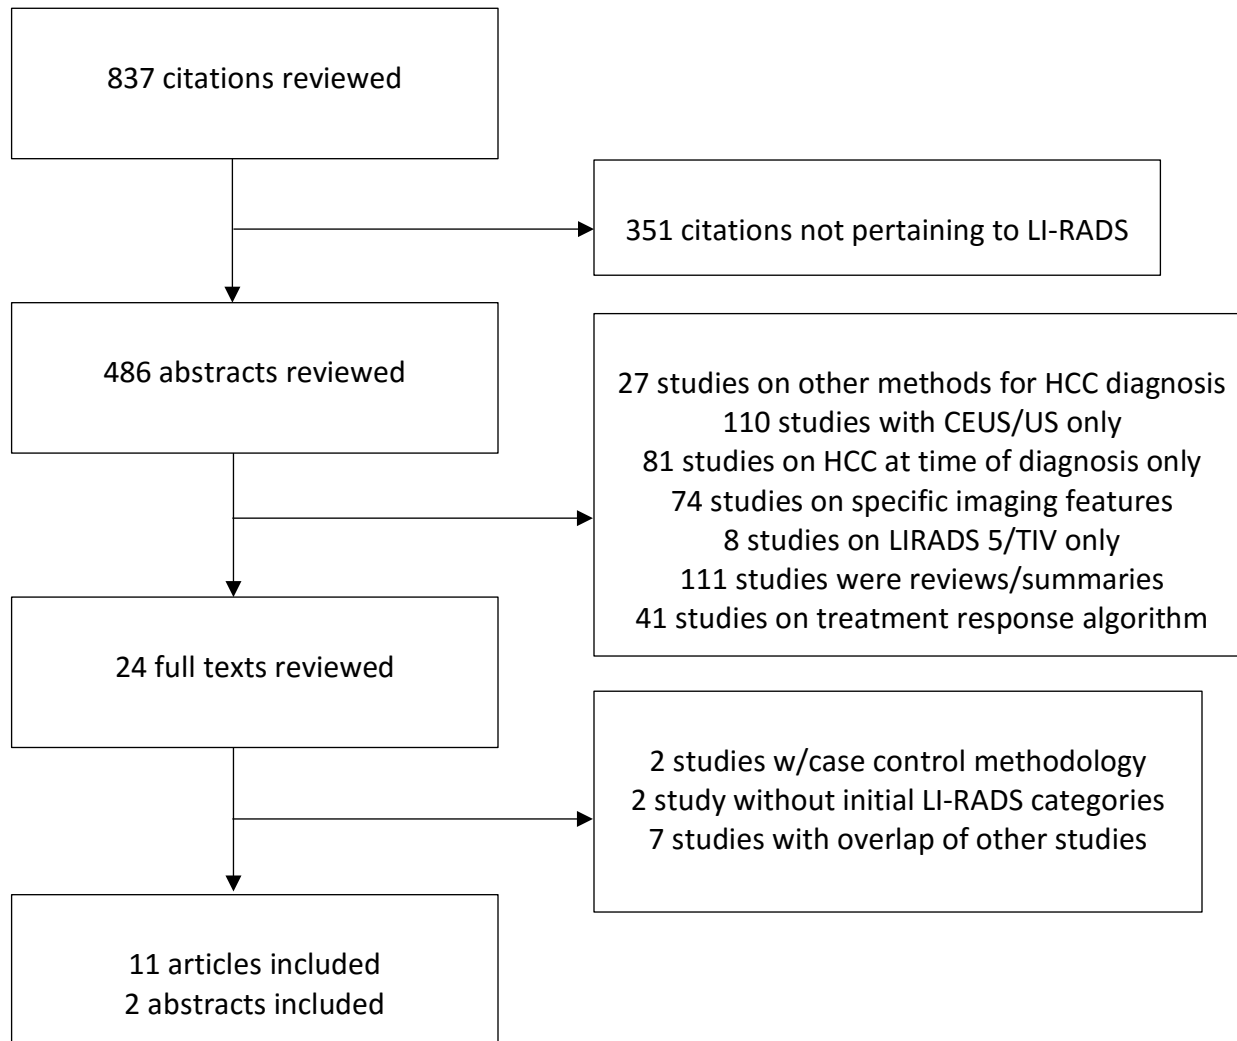

Supplement: NIHMS1837120-supplement-1.pdf [file NIHMS1837120-supplement-1.pdf]
